# Supplementary material
Source: Springer Nature journal article supplement (https://www.springermedizin.de/resource/supplementary/12903_2010_196_MOESM1_ESM.pdf/9516330)
Supplement: MOESM1 [file 9516330]

1. How did the students come to be studying dentistry through a graduate entry programme, and what were their motivations for the choice of dentistry as a career?
2. What factors influence graduate entry students' career expectations for their professional working lives as dentists' in the short-term and long-term?
3. What factors did students suggest will influence their short-and long-term contribution to the dental profession; and how did their personal concerns, commitments as well as previous career and educational pathway impact on - and shape - their choices?
4. What factors within and outside the field of dentistry did graduate entry students believe will impact on their educational and (future) career plans; and how did students appraise, prioritise and arrange these issues and concerns?
5. Do any of the issues explored with graduate entry students have utility for, or impact upon, the future workforce decision-making pertaining to this group or within wider planning?
